# Supplementary material
Source: publisher figshare collection journal article supplement (https://gsajournals.figshare.com/ndownloader/files/28002711)
Supplement: Supplementary file 1 [file 28002711]

## Sheet: TableS4_thresholds
Table S4: Maximum lesion size and median thresholds. These thresholds were used for the partitioning of technical and biological failures in developing lesions as well as the percentage of data points removed in each of the eight eudicot species.
Species	Lesion threshold [cm2]	Median threshold [cm2]	Data removed
B.rapa	0.15	0.2	0.06
C.endivia	0.2	0.25	0.08
C.intybus	0.2	0.25	0.1
G.max	0.15	0.2	0.17
H.annuus	0.3	0.35	0.05
Lactuca	0.15	0.2	0.14
Solanum	0.15	0.2	0.19
Arabidopsis	0.15	0.2	0.26
Average			0.13
